# Supplementary material for: T-Cell-Specific Deletion of Map3k1 Reveals the Critical Role for Mekk1 and Jnks in Cdkn1b-Dependent Proliferative Expansion
Source: PubMed Central journal article supplement (PMC4733086; doi:10.1016/j.celrep.2015.12.047), 2016-01-07

Cell Reports

Supplemental Information

**T-Cell-Specific Deletion of *Map3k1* Reveals  
the Critical Role for Mekk1 and Jnks  
in *Cdkn1b*-Dependent Proliferative Expansion**

Tesha Suddason, Saba Anwar, Nikolaos Charlaftis, and Ewen Gallagher

## Supplementary information

### Supplementary materials

#### Mice

*Map3k1*<sup>AKD</sup> mice were generated as previously described (Gao et al., 2004), and *Cdkn1b*<sup>-/-</sup> mice (The Jackson Laboratory) were maintained in accordance with the vendor's protocols. To produce mice with a T cell-specific *Map3k1* deletion, *Map3k1*<sup>ff</sup> homozygote mice were crossed with *Lck*<sup>Cre</sup> mice (Jackson Laboratory) (Hennet et al., 1995). All strains of mice were present on the C57BL/6 background, and bred and maintained under pathogen free conditions in accordance with the guidelines of Imperial College London and the Home Office (London, UK).

#### Reagents and antibodies

PBS-57-loaded CD1d tetramers were provided by the National Institutes of Health (NIH) Tetramer Facility (Atlanta, USA). KRN7000 (Enzo Life Sciences), an  $\alpha$ -GalCer analogue, was used to stimulate iNKT cells. Anti-APC TCR $\beta$  (H57-597) (eBioscience), anti-FITC CD3 $\epsilon$  (145-2C11) (eBioscience), anti-FITC NK1.1 (PK136) (eBioscience), anti-APC CD44 (IM7) (eBioscience), anti-FITC CD8 (53-6.7) (eBioscience), anti-PE Cy7-CD4 (GK1.5) (eBioscience), anti-FITC  $\gamma\delta$  TCR (eBioscience) anti-PE Cy7-IFN- $\gamma$  (BVD6-24G2) (Cell Signaling), anti-phospho p38 (15) (Cell Signaling), anti-phospho JNK (26) (Cell Signaling), anti-p27<sup>Kip1</sup> antibody (JZA0211031) (R&D Systems), anti-HA (32-6700) (Invitrogen), anti-Myc (R950-25) (Invitrogen), anti-p38 (9212) (Cell Signaling), anti-phospho p38 (9211) (Cell Signaling), anti-JNK (9252) (Cell Signaling), anti-c-Jun (60A8) (Cell Signaling), anti-phospho c-Jun (Ser73) (D47G9) (Cell Signaling), anti-phospho c-Jun (Ser73) (D47G9) XP<sup>®</sup> Rabbit mAb (Alexa Fluor<sup>®</sup> 488 Conjugate) (Cell Signaling), anti-

CARD11 (sc-20458) (Cell Signaling), anti-mouse Ub (13-1600) (Invitrogen), anti-Lys63-linked Ub (5621) (Cell Signaling), anti-phospho ERK (M8159) (Sigma), anti-ERK (M5670) (Sigma) and anti-Tubulin (T5168) (Sigma) antibodies were used according to the manufacturers protocols. SP600125 (IC<sub>50</sub> 40 nM JNK inhibitor, Sigma), PD98059 (IC<sub>50</sub> 2 μM MEK inhibitor, Sigma), SB203580 (IC<sub>50</sub> 0.5 μM p38 inhibitor, Sigma), SU9516 (IC<sub>50</sub> 200 nM CDK inhibitor, Santa Cruz) and NSC697923 (IC<sub>50</sub> 745 nM Ube2N inhibitor, Millipore) were used according to the manufacturers protocols. Mekk1 constructs were generated and utilized as previously described (Charlaftis et al., 2014).

### Supplementary figure and table legends

**Figure S1.** T cell-specific deletion of *Map3k1*, related to figure 1. (A) Schematic illustrating the genomic PCR genotyping strategy for the floxed *Map3k1* allele. (B) Genomic PCR of the floxed *Map3k1* allele (WT band of 266 bp, mutant band of 113 bp and recombinant band of 408 bp) using DNA prepared from WT, *Map3k1<sup>f/+</sup>* and *Map3k1<sup>ff</sup>* mice. (C) CD4<sup>+</sup> T cells were isolated from WT, *Map3k1<sup>AKD</sup>* and *Lck<sup>Cre/+</sup> Map3k1<sup>ff</sup>* mice and incubated with anti-CD3 and anti-CD28 antibodies. Cytokine mRNA level was quantitated after 24 hrs by real-time PCR and the relative amount of *Il4* mRNA to WT cells was given an arbitrary value of 1. The average relative amount ( $\pm$  SEM) from 3 independent experiments was statistically analyzed by two-tailed Student's t test (\*,  $p \leq 0.05$ ; \*\*,  $p \leq 0.01$ ; \*\*\*,  $p \leq 0.001$ ). (D) Intraepithelial lymphocytes were isolated from the small intestine of WT and *Lck<sup>Cre/+</sup> Map3k1<sup>ff</sup>* mice, stained with anti- $\gamma\delta$  TCR and anti-CD3 antibodies and analyzed by flow cytometry as indicated. Data is representative of 3 independent experiments. Numbers in the profiles indicate the percentages of the gated populations. (E) Thymocytes,

splenocytes and liver cells from WT and *Lck<sup>Cre/+</sup>* mice were isolated, stained with anti-CD4 and anti-CD8 antibodies and analyzed by flow cytometry as indicated. Data is representative of 3 independent experiments. Numbers in the profiles indicate the percentages of the gated populations.

**Figure S2.** *Map3k1* regulates iNKT cells, related to figure 2. (A) Cell suspensions were isolated from the spleen, thymus, bone marrow and liver from WT and *Lck<sup>Cre/+</sup>* mice, stained with CD1d tetramer and anti-CD3 antibodies and analyzed by flow cytometry as indicated. Data is representative of 3 independent experiments. Numbers in the profiles indicate the percentages of the gated populations. (B) Splenocyte, thymocyte, bone marrow and liver cells from WT, *Map3k1<sup>AKD</sup>* and *Lck<sup>Cre/+</sup> Map3k1<sup>ff</sup>* mice were isolated, stained with PBS-57-loaded CD1d tetramer and anti-NK1.1 antibody and analyzed by flow cytometry as indicated. Data is representative of 3 independent experiments. Numbers in the profiles indicate the percentages of the gated populations. (C) Statistical analysis of the iNKT population (CD1d tetramer<sup>+</sup>TCRβ<sup>+</sup>) within the thymus from WT, *Map3k1<sup>AKD</sup>* and *Lck<sup>Cre/+</sup> Map3k1<sup>ff</sup>* mice. The average percentage (± SEM) of CD1d-tetramer and TCRβ positive cells from 5 independent experiments is shown (• WT, ■ *Map3k1<sup>AKD</sup>* and ▲ *Lck<sup>Cre/+</sup> Map3k1<sup>ff</sup>* mice). Statistical differences were analyzed by two-tailed Student's t test (\*,  $p \leq 0.05$ ; \*\*,  $p \leq 0.01$ ; \*\*\*,  $p \leq 0.001$ ).

**Figure S3.** Analysis of Mekk1 signaling in iNKT cells, related to figure 3. (A) Quantitation of phospho-Jnk activation in Fig. 3A. Mean intensity for each experimental point was measured by densitometry. (B) Quantitation of phospho-p38 activation in Fig. 3A. Mean intensity for each experimental point was measured by



densitometry. (C) iNKT cells were isolated (4 mice per experiment) and stimulated by TCR crosslinking with antibodies over a 60 mins timecourse. Lysates were made under non-denaturing conditions and IB and IP performed as indicated. (D) A model illustrating Mekk1-dependent TCR signaling in iNKT cells.

**Figure S4.** Role of *Map3k1* in the iNKT cell response to glycolipid antigen, related to figure 4. (A) Short-term iNKT cell expansion in WT and *Lck<sup>Cre/+</sup> Map3k1<sup>fl/fl</sup>* mice. WT (-) and *Lck<sup>Cre/+</sup> Map3k1<sup>fl/fl</sup>* (-) mice were i.p. immunized with  $\alpha$ -GalCer for 2 hrs, splenocytes isolated and stained with CD1d tetramer, anti-IFN- $\gamma$  (top panel), anti-IL-4 (middle panel) and anti-CD69 (bottom panel) antibodies and analyzed by flow cytometry as indicated. Data is representative of three independent experiments (2 mice per experiment). Histograms show the IFN- $\gamma$  (top panel), IL-4 (middle panel) and CD69 (bottom panel) present in the gated iNKT cell population. (B) WT, *Map3k1<sup>AKD</sup>* and *Lck<sup>Cre/+</sup> Map3k1<sup>fl/fl</sup>* mice were treated with water containing BrdU and i.p. immunized with  $\alpha$ -GalCer for 3 days or left unimmunized. iNKT cells were isolated as above (■ spleen and ■ liver) and analyzed by flow cytometry for BrdU incorporation. Representative results from 3 quantitated iNKT proliferation experiments were statistically analyzed, where appropriate, by two-tailed Student's t test (\*,  $p \leq 0.05$ ; \*\*,  $p \leq 0.01$ ; \*\*\*,  $p \leq 0.001$ ). (C) Statistical analysis of  $\alpha$ -GalCer-dependent liver iNKT expansion at days 0 and 3 in *Map3k1*-deficient mice. The average percentage ( $\pm$  SEM) of PBS-57-loaded CD1d tetramer<sup>+</sup> TCR $\beta$ <sup>+</sup> cells from 5 independent experiments is shown (■ WT, ■ *Map3k1<sup>AKD</sup>* and ■ *Lck<sup>Cre/+</sup> Map3k1<sup>fl/fl</sup>* mice). Differences were analyzed by two-tailed Student's t test (\*,  $p \leq 0.05$ ; \*\*,  $p \leq 0.01$ ; \*\*\*,  $p \leq 0.001$ ). (D) Representative H&E stained liver sections were prepared from unstimulated (upper panels) and 3-day  $\alpha$ -GalCer stimulated (lower panels) WT

and *Lck<sup>Cre/+</sup>* mice (original magnification x40, scale bar = 10  $\mu$ M). Data is representative of 3 independent experiments (2 mice per experiment).

**Figure S5.** Mekk1 signaling regulates *Cdkn1b* expression and iNKT cell proliferative expansion, related to figure 5. (A) The bioinformatics gene wheel analyzes global gene expression hits from *Map3k1<sup>AKD</sup>* iNKT cells and indicates their cellular and molecular function. Color intensity indicates the range of expression from an upregulation of 3.347 to a downregulation of -5.847. (B) WT and *Lck<sup>Cre/+</sup> Map3k1<sup>fl/fl</sup>* mice were 3-day immunized with  $\alpha$ -GalCer (■ WT and ■ *Lck<sup>Cre/+</sup> Map3k1<sup>fl/fl</sup>*), RNA was extracted from their splenic iNKT cells, reverse transcribed and real-time PCR performed. The average relative expression ( $\pm$  SEM) of genes from 3 independent experiments was statistically analyzed, where appropriate, by two-tailed Student's t test (\*,  $p \leq 0.05$ ; \*\*,  $p \leq 0.01$ ; \*\*\*,  $p \leq 0.001$ ). (C) WT and *Lck<sup>Cre/+</sup> Map3k1<sup>fl/fl</sup>* mice were 3-day immunized with  $\alpha$ -GalCer, RNA was extracted from liver iNKT cells, RNA was reverse transcribed and real-time PCR performed (■ WT and ■ *Lck<sup>Cre/+</sup> Map3k1<sup>fl/fl</sup>*). The average relative expression ( $\pm$  SEM) of genes from 3 independent experiments was statistically analyzed, where appropriate, by two-tailed Student's t test (\*,  $p \leq 0.05$ ; \*\*,  $p \leq 0.01$ ; \*\*\*,  $p \leq 0.001$ ). (D). RNA was isolated from WT and *Map3k1<sup>AKD</sup>* iNKT cells, processed and hybridized onto Affymetrix arrays. Bioinformatics analysis was performed on integrin gene expression as indicated and a heat map comparing gene hits between WT and *Map3k1<sup>AKD</sup>* iNKT cell microarray screens was constructed. The data is from 3 independent experiments (4 mice per experiment).

**Table S1.** Analysis of thymocytes in *Map3k1* mutant mice, related to figure 1. Total numbers of thymocytes from WT and *Lck<sup>Cre/+</sup> Map3k1<sup>fl/fl</sup>* mice were counted and percentages of subpopulations were quantitated by FACS analysis (Gao et al., 2004).

|                                       | WT          | <i>Lck<sup>Cre/+</sup> Map3k1<sup>fl/fl</sup></i> mice |
|---------------------------------------|-------------|--------------------------------------------------------|
| Total cell number (x10 <sup>6</sup> ) | 172 ±49     | 175 ±51                                                |
| CD4 <sup>+</sup> CD8 <sup>+</sup> (%) | 91.65±0.30  | 86.1±0.808                                             |
| CD4 <sup>-</sup> CD8 <sup>+</sup> (%) | 6.28±0.204  | 10.56±1.073                                            |
| CD4 <sup>+</sup> CD8 <sup>-</sup> (%) | 10.93±0.052 | 14.4±0.221                                             |

**Table S2.** iNKT cell affymetrix microarray hits from *Map3k1*-deficient versus control mice undergoing a clonal burst (2-fold or more changes are listed), related to figure 5.

| ID      | Fold Change | Entrez Gene Name                                                                       | Location            | Type(s)                           |
|---------|-------------|----------------------------------------------------------------------------------------|---------------------|-----------------------------------|
| Klrc3   | 2.799       | killer cell lectin-like receptor subfamily C, member 2                                 | Plasma Membrane     | other                             |
| Ar      | 2.397       | androgen receptor                                                                      | Nucleus             | ligand-dependent nuclear receptor |
| Klrk1   | 2.266       | killer cell lectin-like receptor subfamily K, member 1                                 | Plasma Membrane     | transmembrane receptor            |
| Klk1b11 | 2.186       | kallikrein-related peptidase 3                                                         | Extracellular Space | peptidase                         |
| Cd101   | -2.008      | CD101 molecule                                                                         | Plasma Membrane     | other                             |
| Cd177   | -2.039      | CD177 molecule                                                                         | Cytoplasm           | other                             |
| Clec4d  | -2.042      | C-type lectin domain family 4, member D                                                | Plasma Membrane     | other                             |
| Il1r2   | -2.054      | interleukin 1 receptor, type II                                                        | Plasma Membrane     | transmembrane receptor            |
| Rorc    | -2.066      | RAR-related orphan receptor C                                                          | Nucleus             | ligand-dependent nuclear receptor |
| Cd33    | -2.078      | CD33 antigen                                                                           | Plasma Membrane     | other                             |
| Tdgf1   | -2.110      | teratocarcinoma-derived growth factor 1                                                | Extracellular Space | growth factor                     |
| Il1b    | -2.152      | interleukin 1, beta                                                                    | Extracellular Space | cytokine                          |
| Camp    | -2.230      | cathelicidin antimicrobial peptide                                                     | Cytoplasm           | other                             |
| Csf3r   | -2.246      | colony stimulating factor 3 receptor (granulocyte)                                     | Plasma Membrane     | transmembrane receptor            |
| Cxcr2   | -2.257      | chemokine (C-X-C motif) receptor 2                                                     | Plasma Membrane     | G-protein coupled receptor        |
| Il17rb  | -2.345      | interleukin 17 receptor B                                                              | Plasma Membrane     | transmembrane receptor            |
| Mmp9    | -2.345      | matrix metalloproteinase 9 (gelatinase B, 92kDa gelatinase, 92kDa type IV collagenase) | Extracellular Space | peptidase                         |
| Cdkn1b  | -2.386      | cyclin-dependent kinase inhibitor 1B (p27, Kip1)                                       | Nucleus             | kinase                            |
| Retnla  | -2.628      | resistin like alpha                                                                    | Extracellular Space | other                             |
| Rbm39   | -2.672      | RNA binding motif protein 39                                                           | Nucleus             | transcription regulator           |
| Il1f9   | -2.699      | interleukin 36, gamma                                                                  | Extracellular Space | cytokine                          |
| Rapgef1 | -2.914      | Rap guanine nucleotide exchange factor (GEF) 1                                         | Cytoplasm           | other                             |
| Ptger1  | -3.025      | prostaglandin E receptor 1 (subtype EP1), 42kDa                                        | Plasma Membrane     | G-protein coupled receptor        |

**Table S3.** Listing of the primers used for real-time PCR, related to experimental procedures.

|                | 5' to 3'                  |                           |
|----------------|---------------------------|---------------------------|
|                | Forward Primer            | Reverse Primer            |
| <i>β-actin</i> | GTCGACAACGGCTCCGGCATGT    | TCCCACCATCACACCCTGGTGCCTA |
| <i>Ar</i>      | TGAGCCAGGAGTGGTGTGTGC     | AAGTTGCGGAAGCCAGGCAAGG    |
| <i>Camp</i>    | AGGAACAGGGGGTGGTGAAGCA    | AGAAGTCCAGCCAGCCGGGAA     |
| <i>Cdkn1b</i>  | GCCAGACGTAAACAGCTCCGAATTA | AGAGGCAGATGGTTTAAGAGTGCCT |
| <i>CD101</i>   | AGTTTCTGCTAAGTTCAGCATCGGC | TTCCTTGGTCGGGGCGCTTG      |
| <i>CD177</i>   | CCTTGCTACCCTGTGTCCCAGC    | GGCAACCCTCGCTAACCTCGC     |
| <i>CD33</i>    | GGGGAGGCAACGGTCAAGCTC     | CCTGCTGATGAGCCTGTGTATGGAA |
| <i>Clec4d</i>  | ACCCGACATCCCCAACTGATCCC   | GCAGGTCCAAGTACCTCCTGTAGC  |
| <i>Csf3r</i>   | ACCCCATGGATGTTGCCCCC      | CTTCCTGCAGGGGCGTTGGC      |
| <i>Cxcr2</i>   | ATCTTCGCTGTTCGTCTTGT      | AGCCAAGAATCTCCGTAGCA      |
| <i>Il17rb</i>  | GGAGGCAAGGAAGGAGCACGA     | CGGCCCCATCTCGGCGATTT      |
| <i>Il1b</i>    | CCCTGCAGCTGGAGAGTGTGGA    | TGTGCTCTGCTTGTGAGGTGCTG   |
| <i>Il1f9</i>   | CCACAGAGTAACCCAGTCAGCG    | TTCCACCTGTCCGGGTGTGGT     |
| <i>Il1r2</i>   | CGGGTCAAAGGAACAACCACGGA   | CGGTACACGGCCTCTTGGG       |
| <i>klk1b11</i> | CACCCACGAAATTCCAAACCCAG   | CCGGCGTATTGGGTTTGCCACA    |
| <i>klrc3</i>   | AGACAGTGAAGAGGAGCAGGACTTT | TCTGCTGTGAGACCAGAAGCTGAC  |
| <i>klrk1</i>   | TCTGCTCAGAGATGAGCAAATGCC  | GCCAAGGCTATAGCAAGGACTCGAA |
| <i>Mmp9</i>    | TGCCCTACCCGAGTGGACGC      | AGCCCAGTGCATGGCCGAAC      |
| <i>Ppbp</i>    | TCCTTGTTGCGCTGGCTCCC      | GTGTGGCTATCACTTCCACATCAGC |
| <i>Ptger1</i>  | ACATGCATGGGGTGGAGCAGC     | TATCAGTGGCCAAGAGGGCCAG    |
| <i>Retnla</i>  | CCTGCCCTGCTGGGATGACT      | GGGCAGTGGTCCAGTCAACGA     |
| <i>Rorc</i>    | TTCCCACTTCTCAGCGCCC       | TGGGTGGCAGCTTGGCTAGGA     |
| <i>Tdgfl</i>   | TCGCAAAGAGCACTGTGGGTC     | AGTGGTCGTACAGACGGCG       |

### Supplementary references

- CHARLAFTIS, N., SUDDASON, T., WU, X., ANWAR, S., KARIN, M. & GALLAGHER, E. 2014. The MEKK1 PHD ubiquitinates TAB1 to activate MAPKs in response to cytokines. *EMBO J*, 33, 2581-96.
- GAO, M., LABUDA, T., XIA, Y., GALLAGHER, E., FANG, D., LIU, Y. C. & KARIN, M. 2004. Jun turnover is controlled through JNK-dependent phosphorylation of the E3 ligase Itch. *Science*, 306, 271-5.
- HENNET, T., HAGEN, F. K., TABAK, L. A. & MARTH, J. D. 1995. T-cell-specific deletion of a polypeptide N-acetylgalactosaminyl-transferase gene by site-directed recombination. *Proc Natl Acad Sci U S A*, 92, 12070-4.

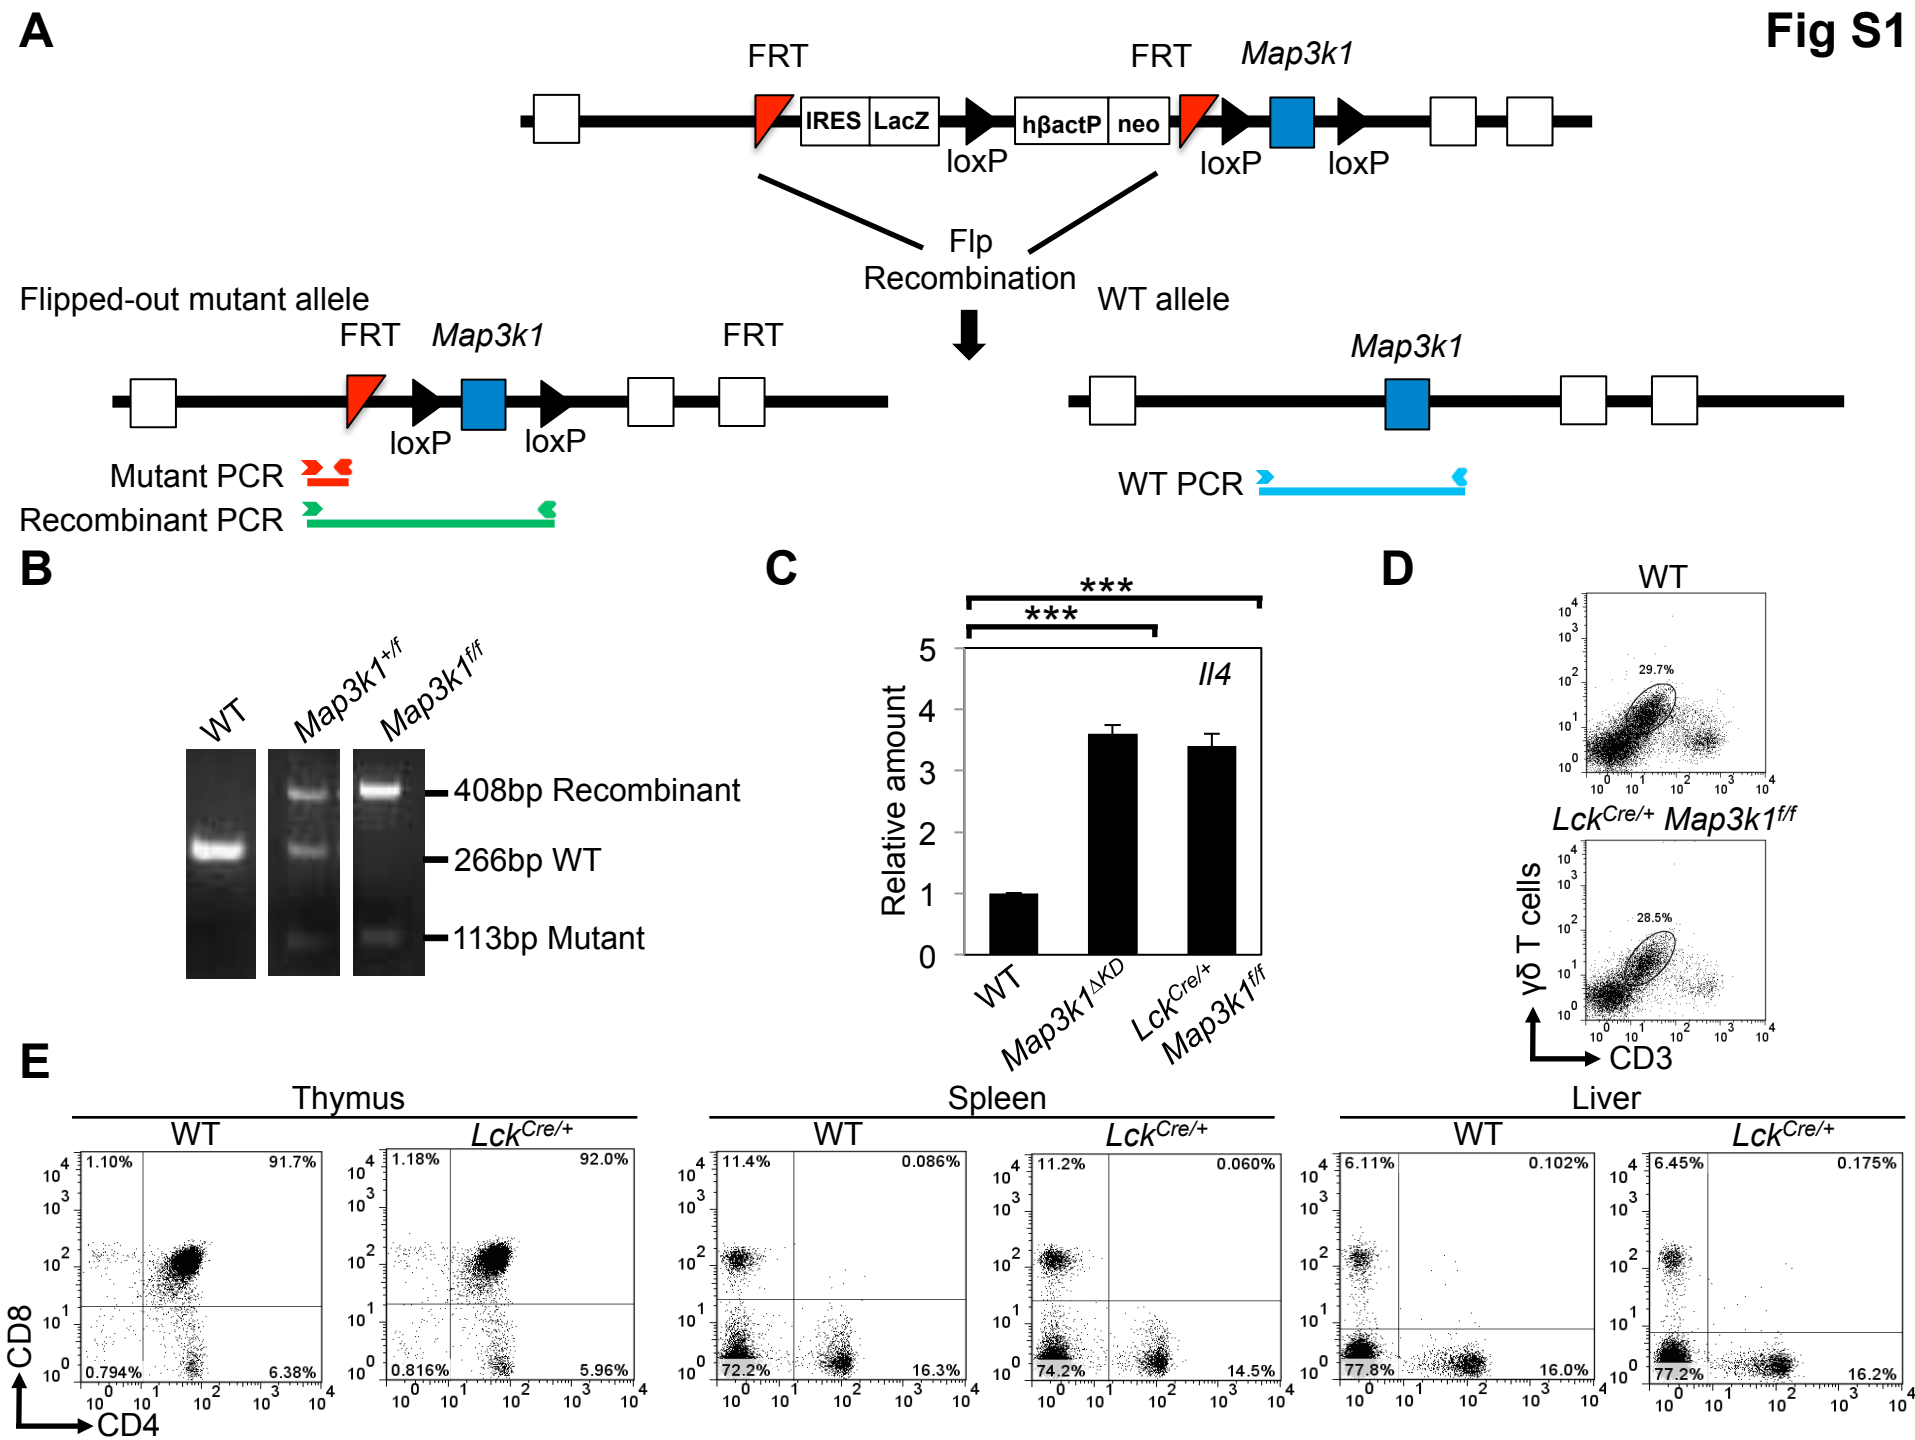

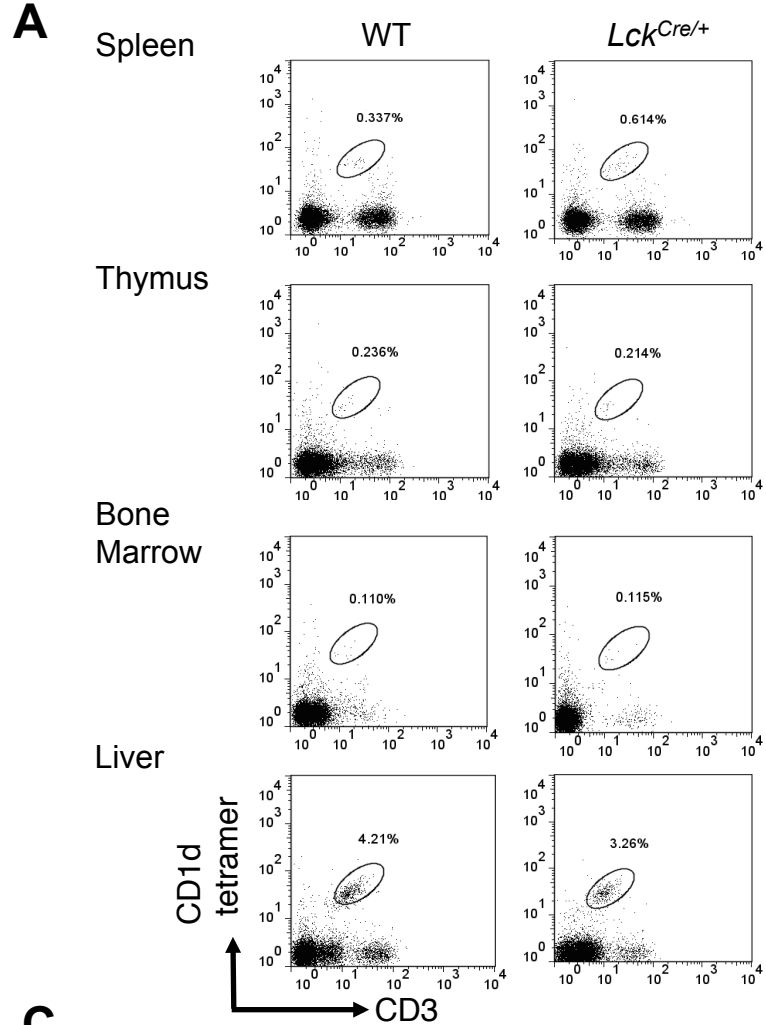**B**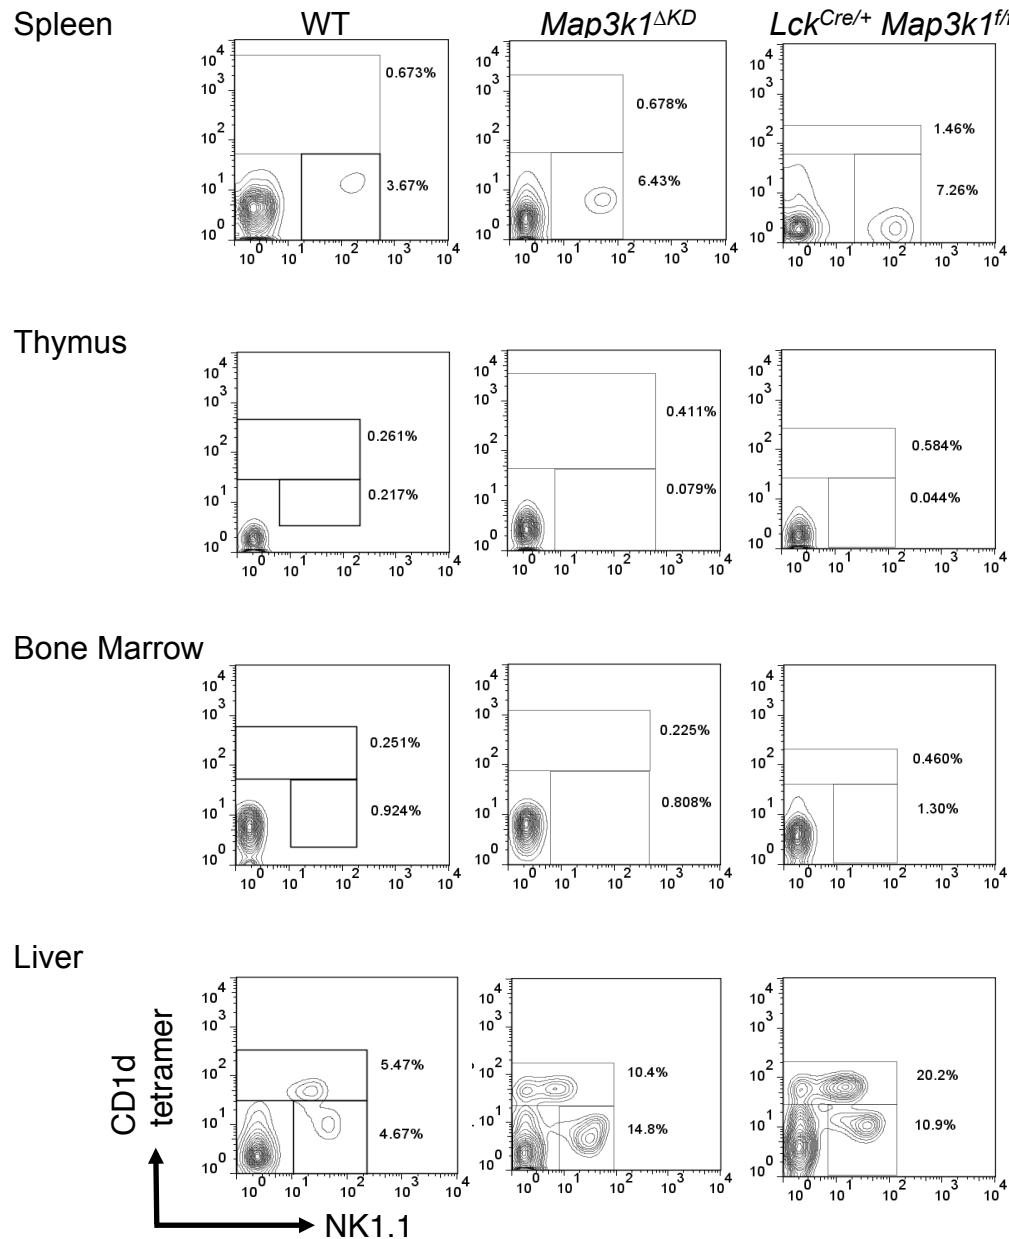**C**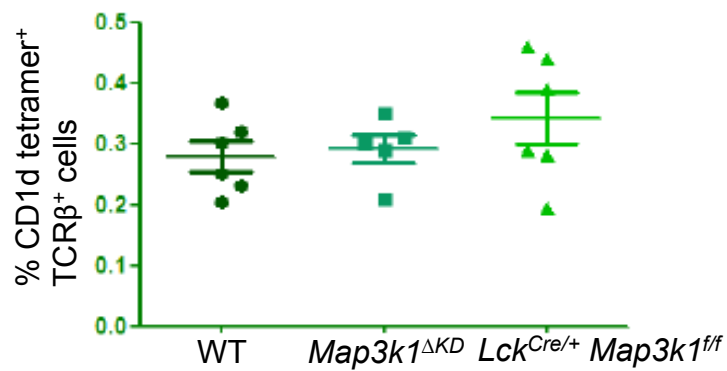



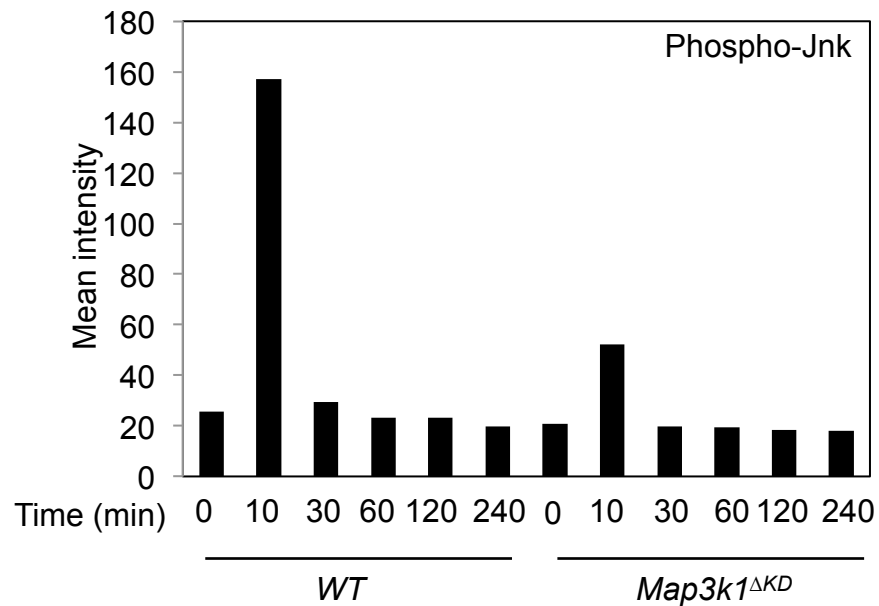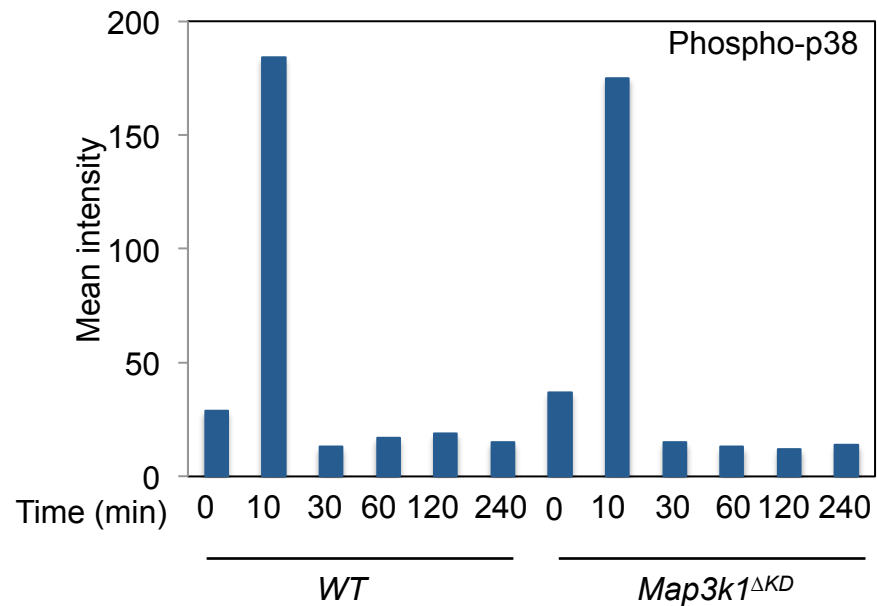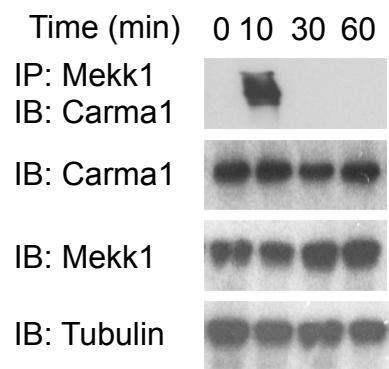

**D**

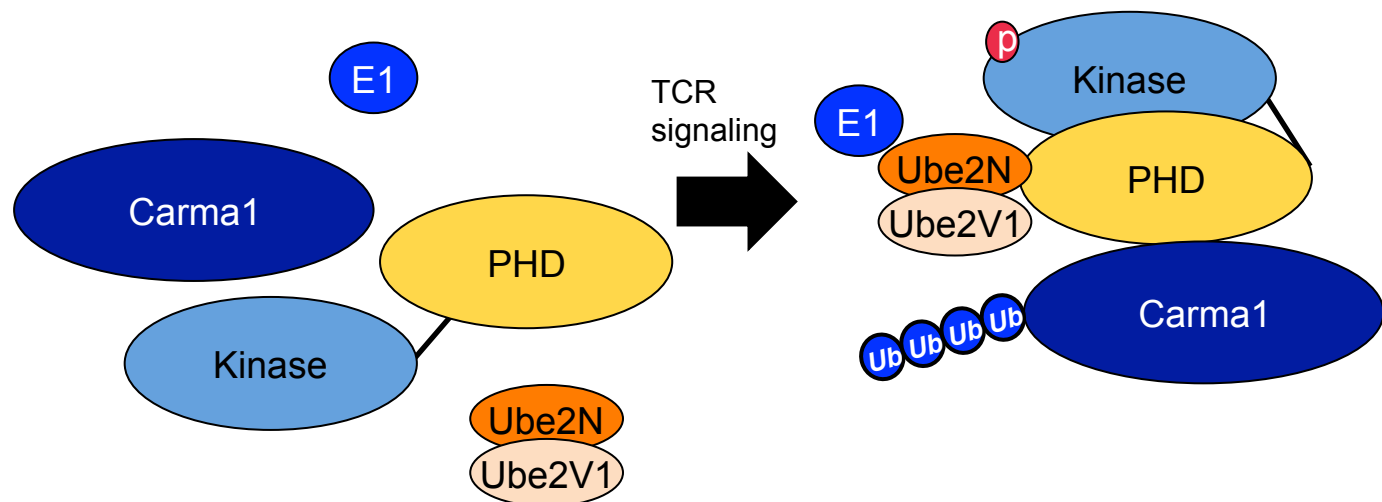

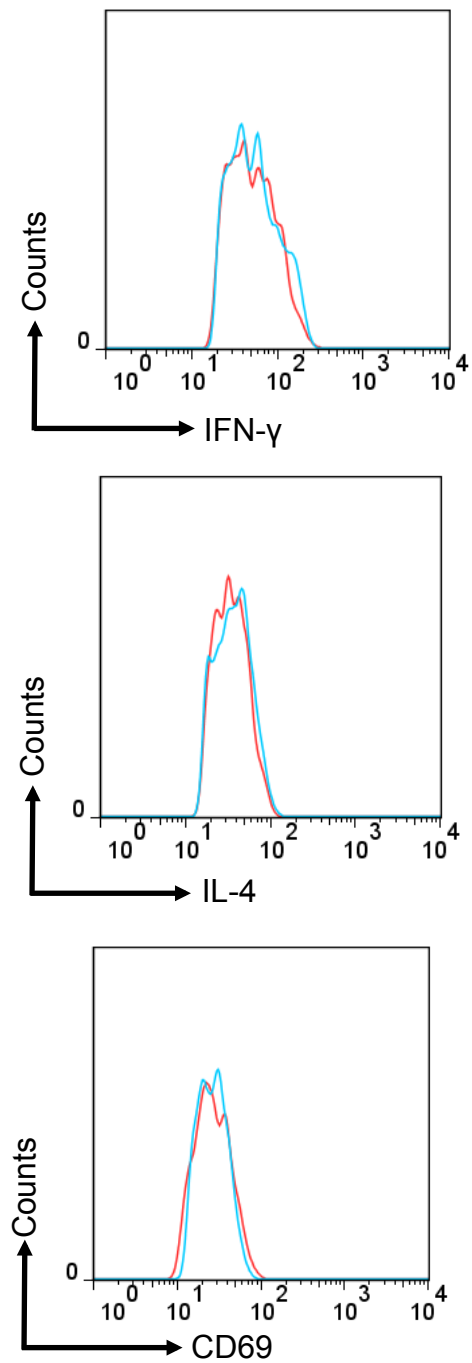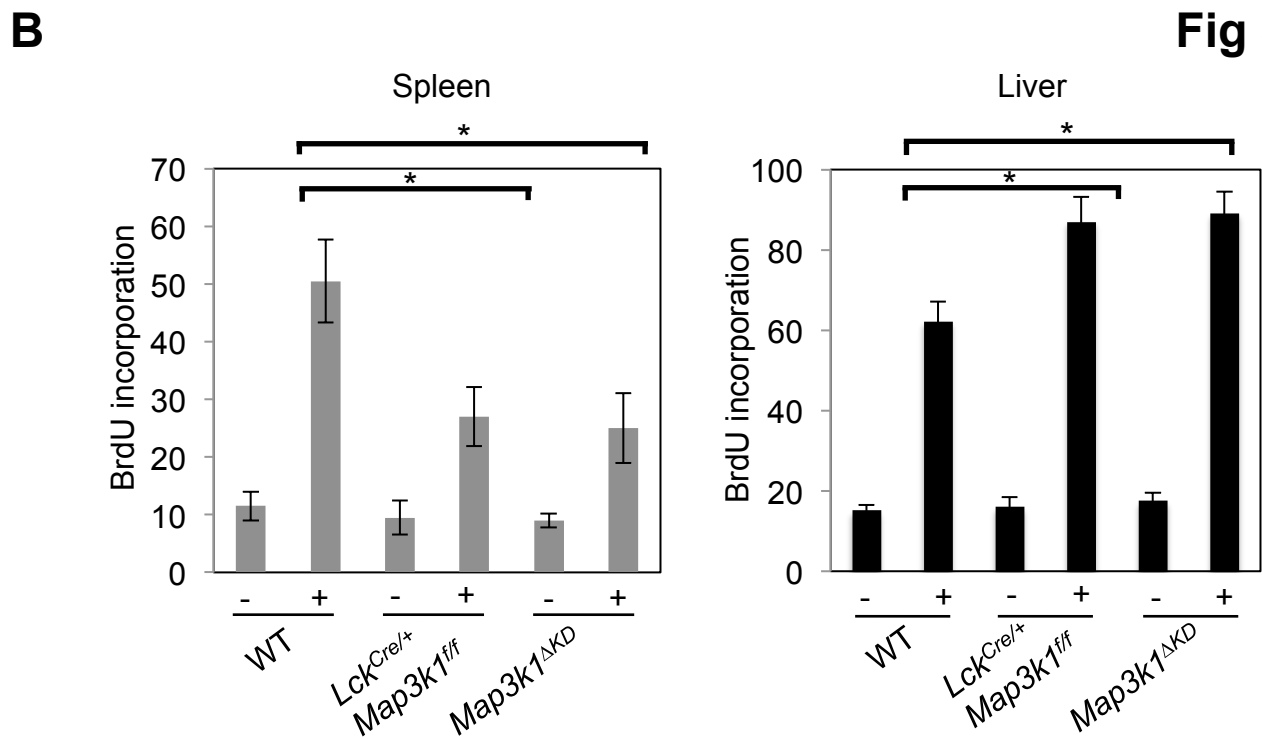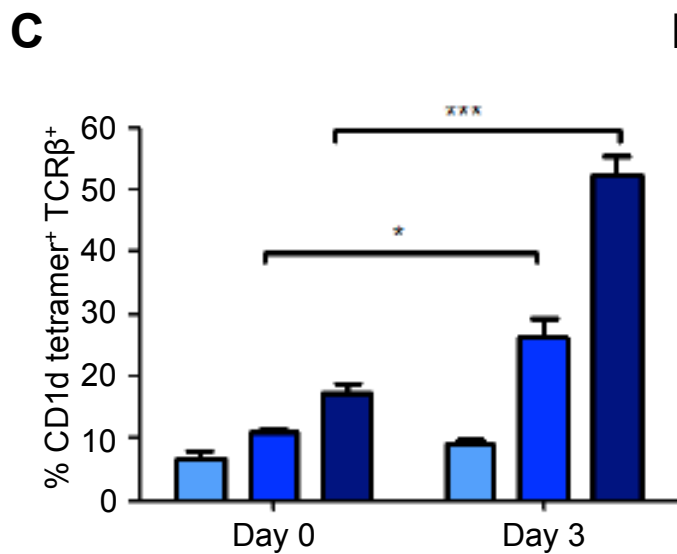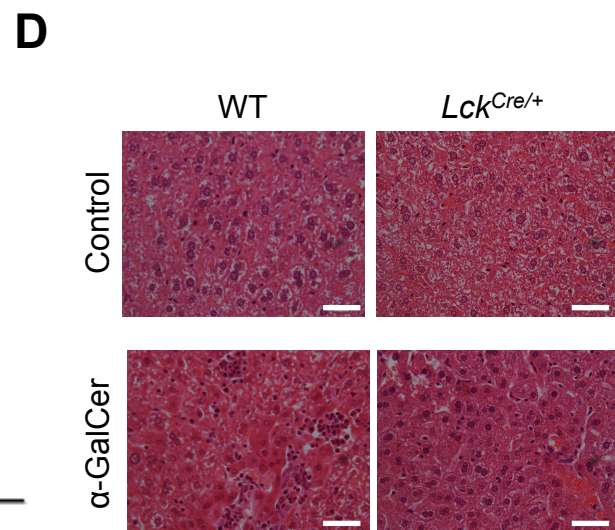

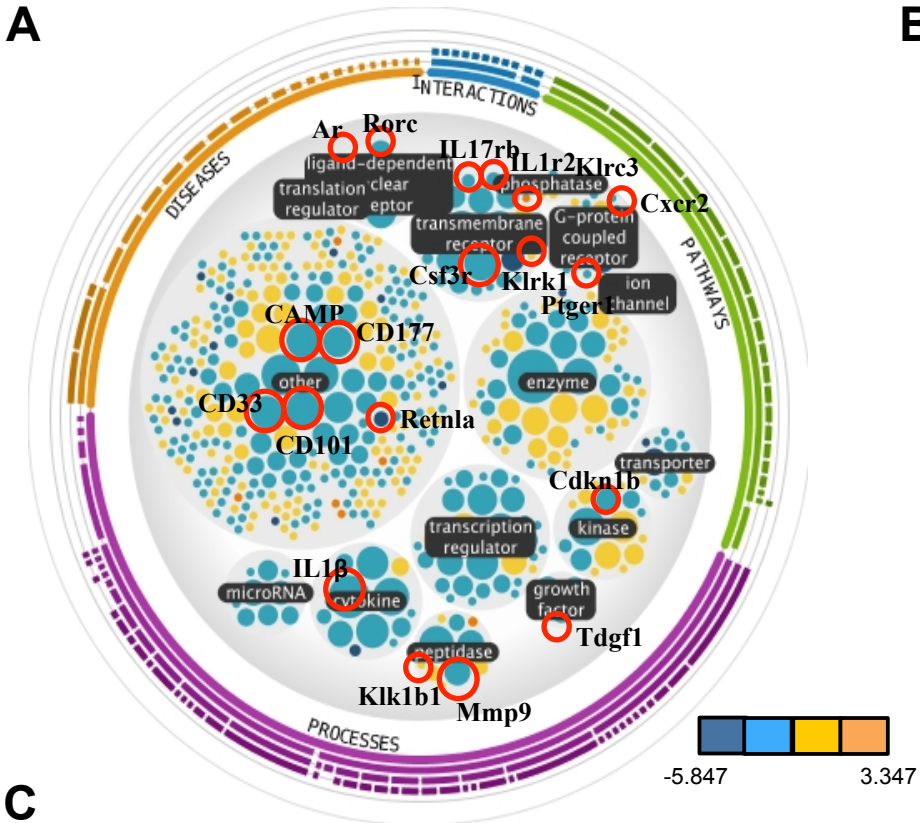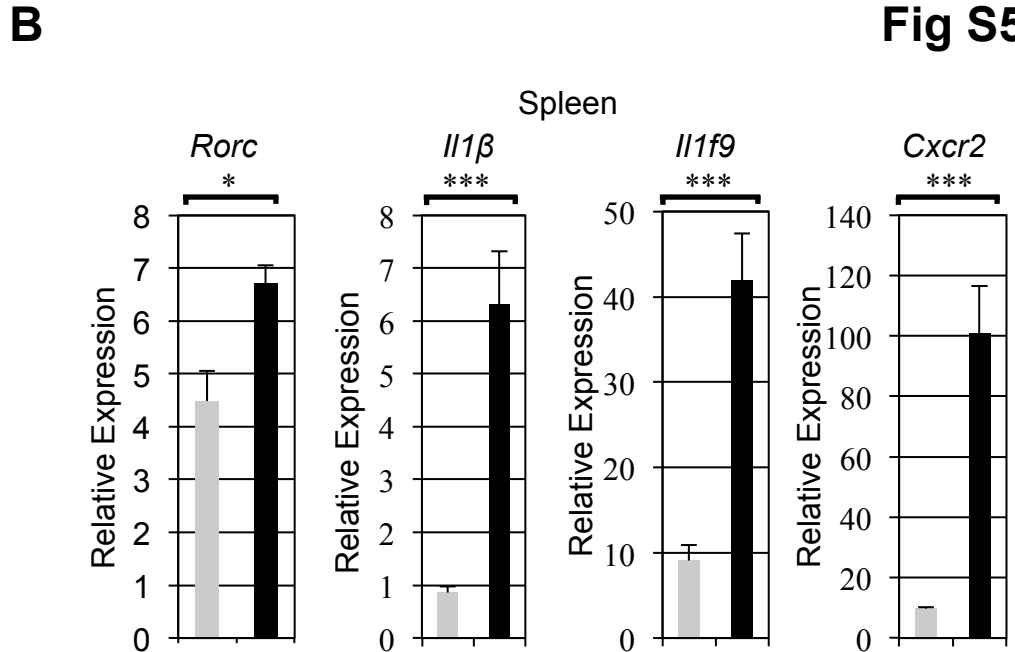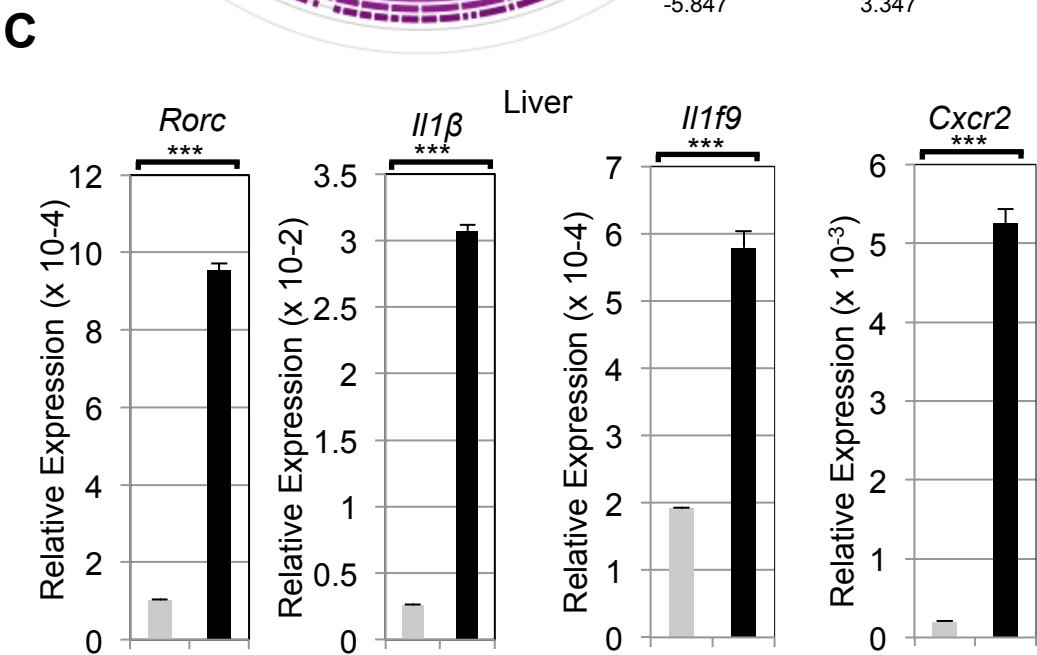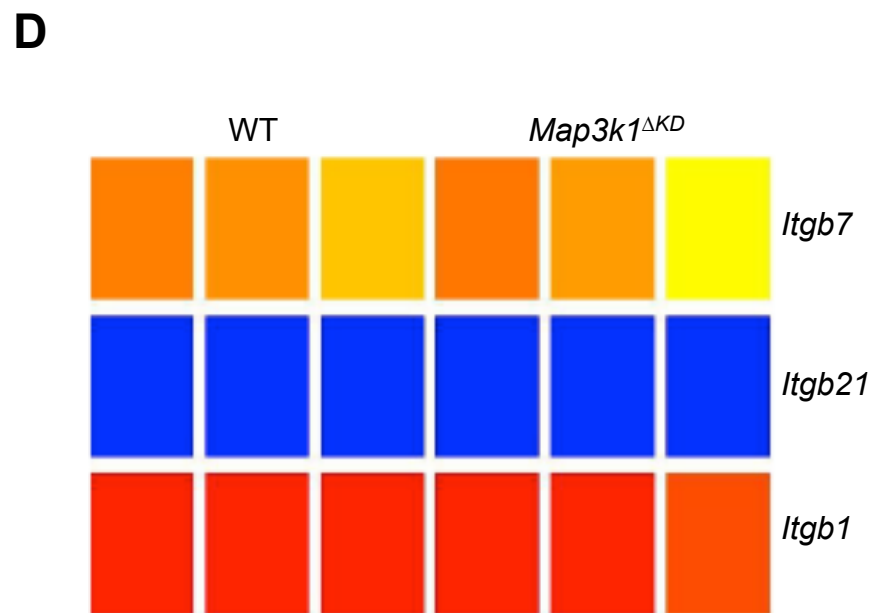

Supplement: mmc1.pdf [file mmc1.pdf]
